SUMMER 2021 | VOLUME 19 | NUMBER 3

# Focus

The Journal of Lifelong Learning in Psychiatry

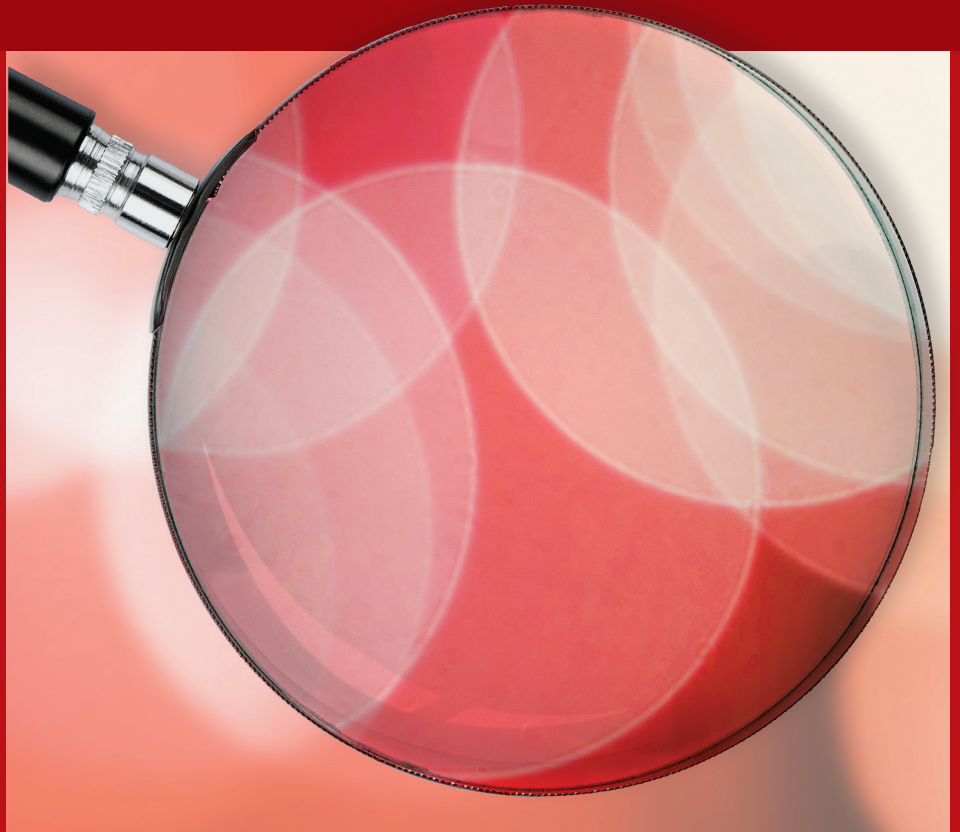

## Updates in Geriatric Psychiatry

Guest Editor: Adriana P. Hermida, M.D.

AMERICAN  
PSYCHIATRIC  
ASSOCIATION

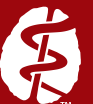

[focus.psychiatryonline.org](http://focus.psychiatryonline.org)
