# ▶ **PODCASTS** from APA Publishing

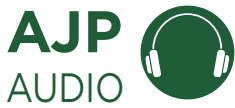

## **AJP Audio**

Host: Michael D. Roy, Executive Editor, *The American Journal of Psychiatry*

Each episode features an in-depth interview with an author from the most discussed article appearing in the latest issue of *The American Journal of Psychiatry*.

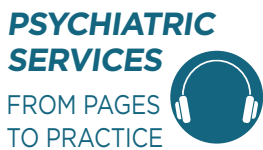

## **Psychiatric Services From Pages to Practice**

Hosts: Lisa Dixon, M.D., M.P.H., Editor, *Psychiatric Services*, and Josh Berezin, M.D., M.S.

Learn about the latest mental health services research published in *Psychiatric Services* and why it is relevant. Topics include community-based treatment programs, collaborative care, evidence-based treatment and service delivery, criminal and social justice, policy analysis, and more.

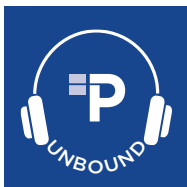

## **Psychiatry Unbound**

Host: Laura Roberts, M.D., M.A., Editor-in-Chief, APA Publishing Books

APA Publishing's Books podcast offers the opportunity to hear the voices behind the most prominent psychiatric scholarship in the field today. Learn about important topics in the field of psychiatry and see how our authors are making an impact in clinical settings throughout the world.

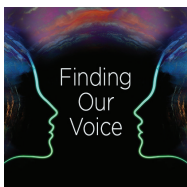

## **Finding Our Voice**

Host: Sanya Virani, MBBS, MPH

**Finding Our Voice** brings the viewpoints and opinions of the next generation of psychiatrists—including residents, fellows, and early career psychiatrists—to the forefront. Topics covered include systemic racism and social determinants.

**Subscribe Today!**

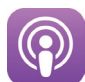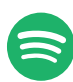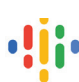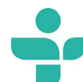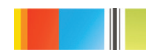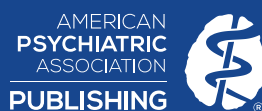

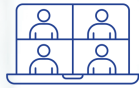

AMERICAN  
PSYCHIATRIC  
ASSOCIATION

**ANNUAL MEETING**  
ON DEMAND 2021

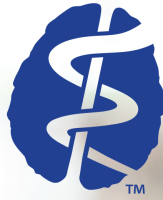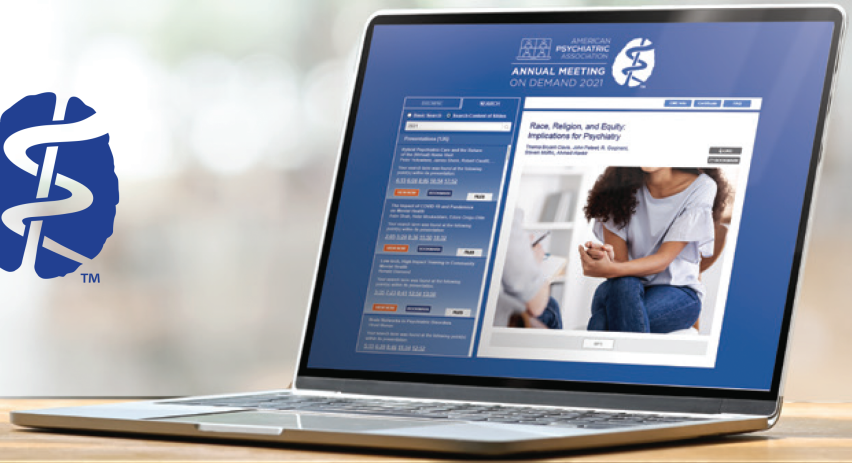

# Psychiatric education and CME — on your time and terms

Access the most recent and relevant science, insights and education in psychiatry — whenever and wherever you choose.

Curated by the world's largest psychiatric organization, APA Annual Meeting On Demand 2021 delivers comprehensive and convenient access to the latest research, new therapies and emerging clinical topics like COVID-19, health equity and global, political and social issues.

Access more than 400 hours of high-quality education from psychiatry thought leaders and earn up to 75 *AMA PRA Category 1 Credits™* on your time and terms with On Demand!

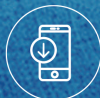

**Sync across  
all your devices**

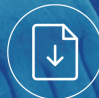

**Download PDFs  
and MP3s**

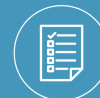

**Earn  
CME credits**

## Order Now!

***APA.OnDemand.org/2021***

**800-501-2303 (U.S. Only)  
or 818-844-3299**

**Mon-Fri 6 a.m.–5 p.m. PT**

**General Pricing: \$899**

**APA Resident Pricing: \$199**

**APA Medical Student Pricing: \$199**

**USB Add On: \$99**

The American Psychiatric Association is accredited by the Accreditation Council for Continuing Medical Education to provide continuing medical education for physicians. The APA designates this enduring material for a maximum of 75 *AMA PRA Category 1 Credits™*. Physicians should claim only the credit commensurate with the extent of their participation in the activity.

Non-physician Health Care Professionals: The APA acknowledges non-physician participation in this educational activity through a certificate of participation. The activity has been designated for up to 75 *AMA PRA Category 1 Credits™*.
